# Supplementary figures and images for: The circadian clock controls temporal and spatial patterns of floral development in sunflower
Source: eLife journal article supplement (doi:10.7554/elife.80984), 2023-01-13

A

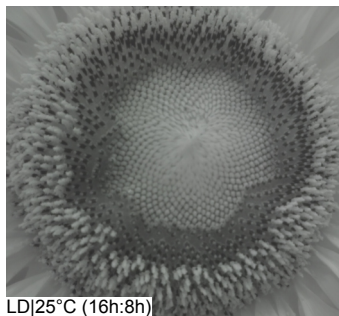

B

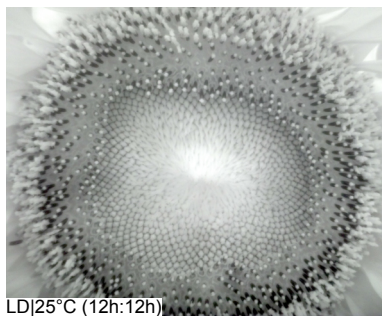

C

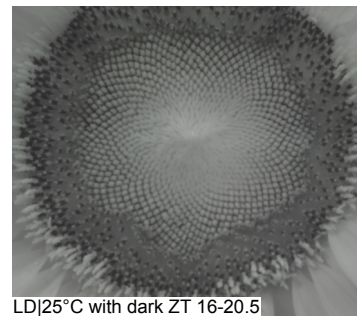

D

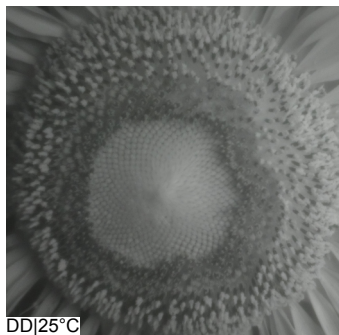

E

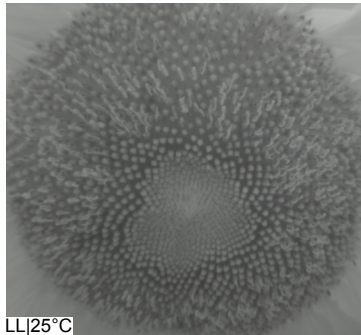

F

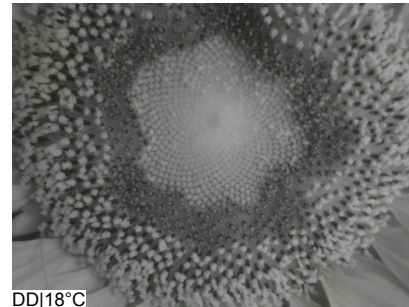

G

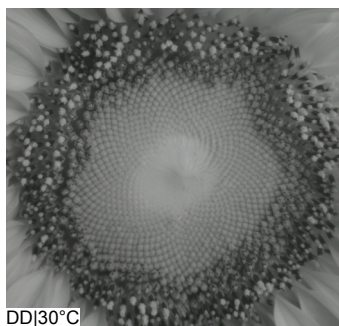

H

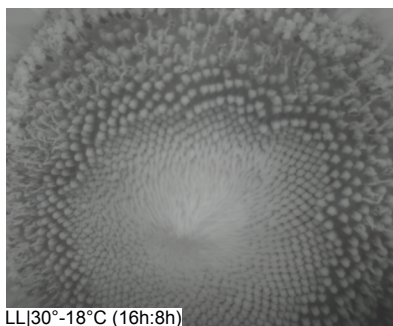

I

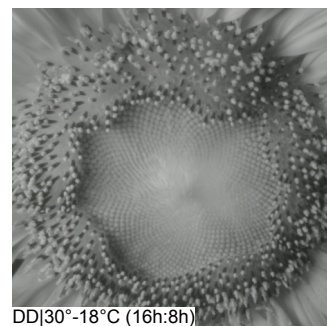

J

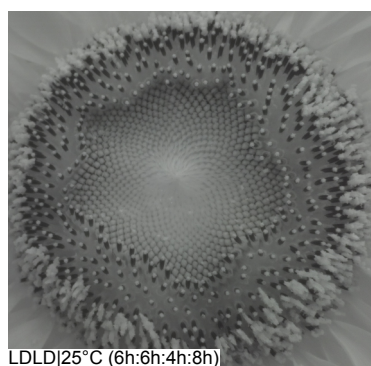

K

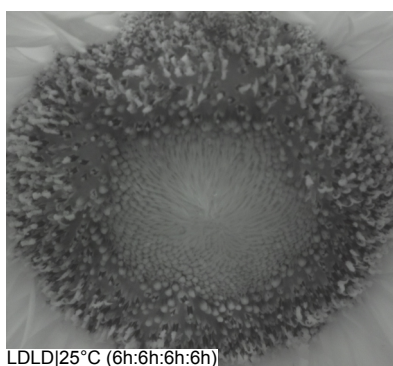

Supplement: supp [file elife_poa_e80984_Figure_2_figure_supplement_1.pdf › elife_poa_e80984_Figure_2_figure_supplement_1.pdf]

A

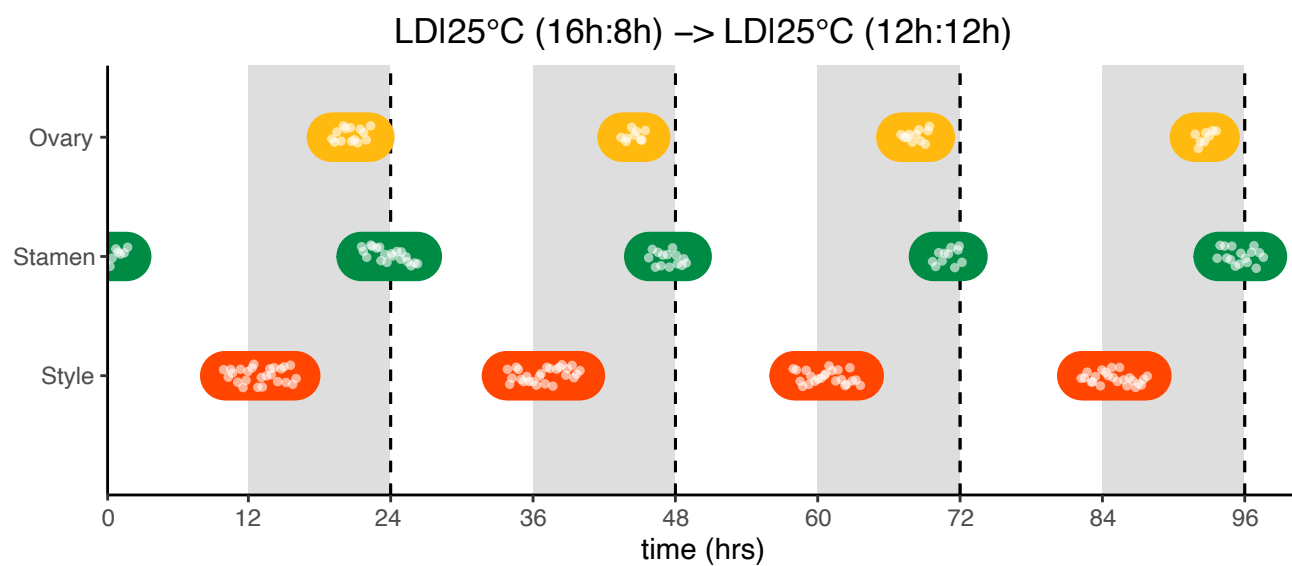

B

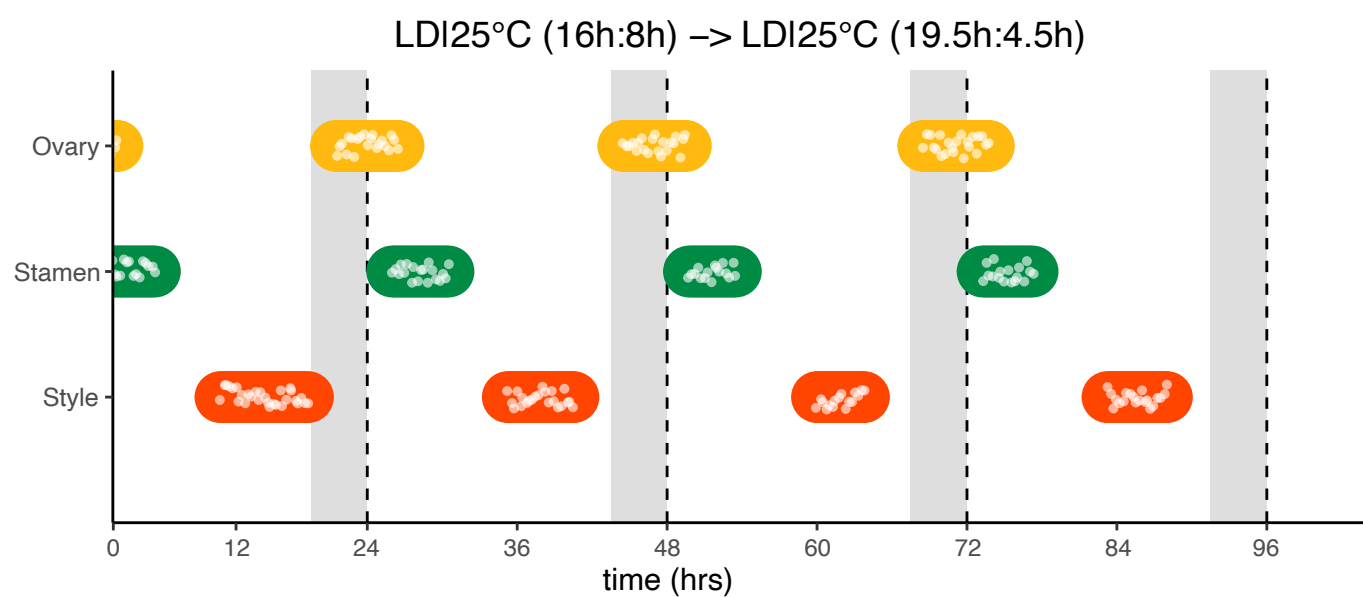

Supplement: supp [file elife_poa_e80984_Figure_2_figure_supplement_2.pdf › elife_poa_e80984_Figure_2_figure_supplement_2.pdf]

DDI25°C

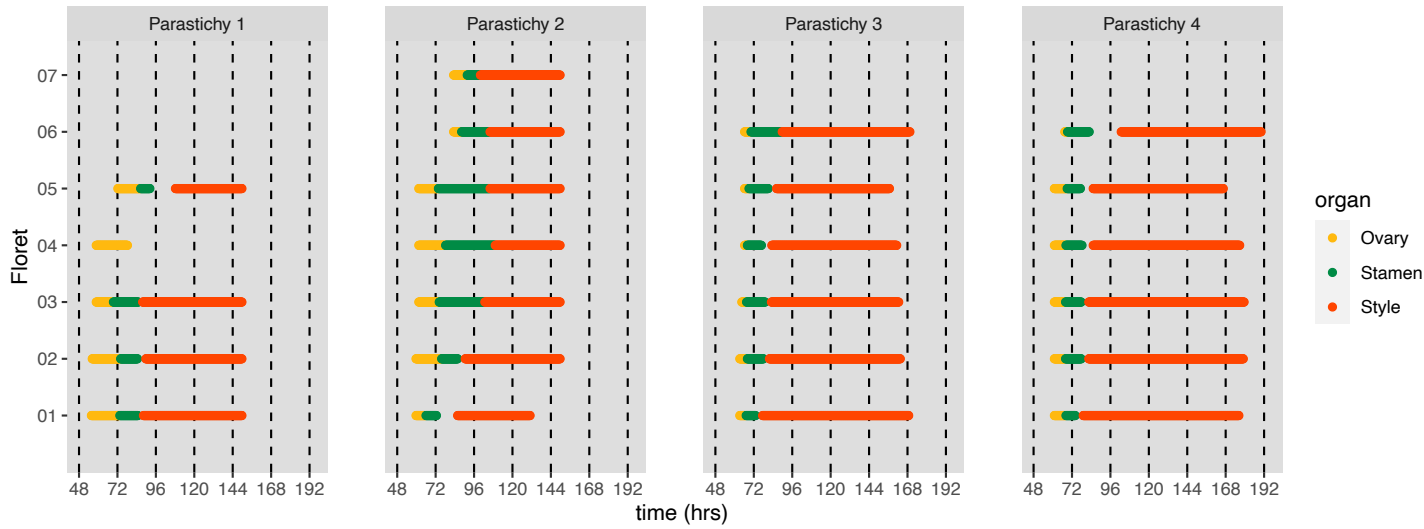

Supplement: supp [file elife_poa_e80984_Figure_3_figure_supplement_1.pdf › elife_poa_e80984_Figure_3_figure_supplement_1.pdf]

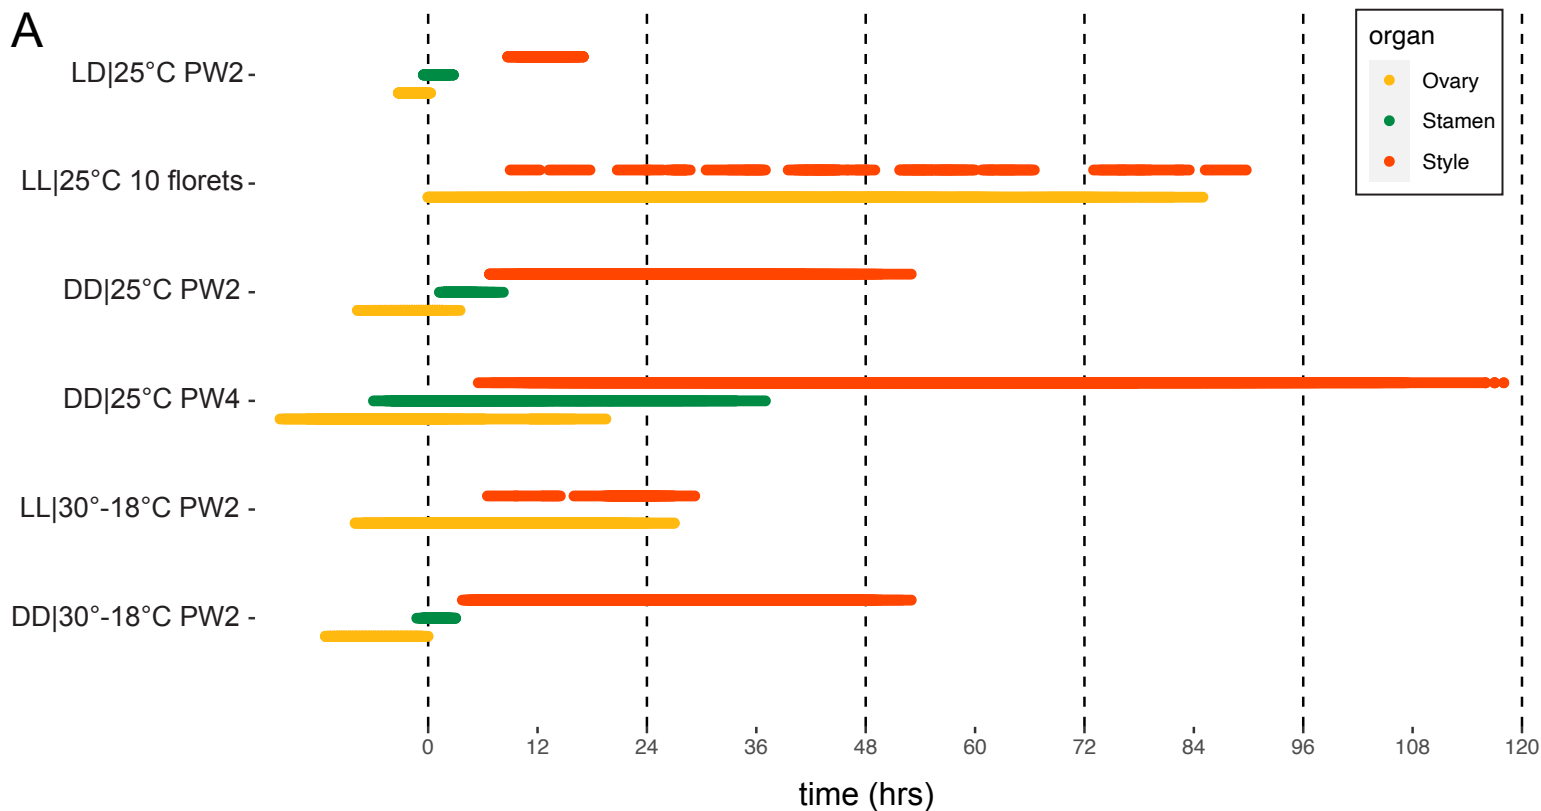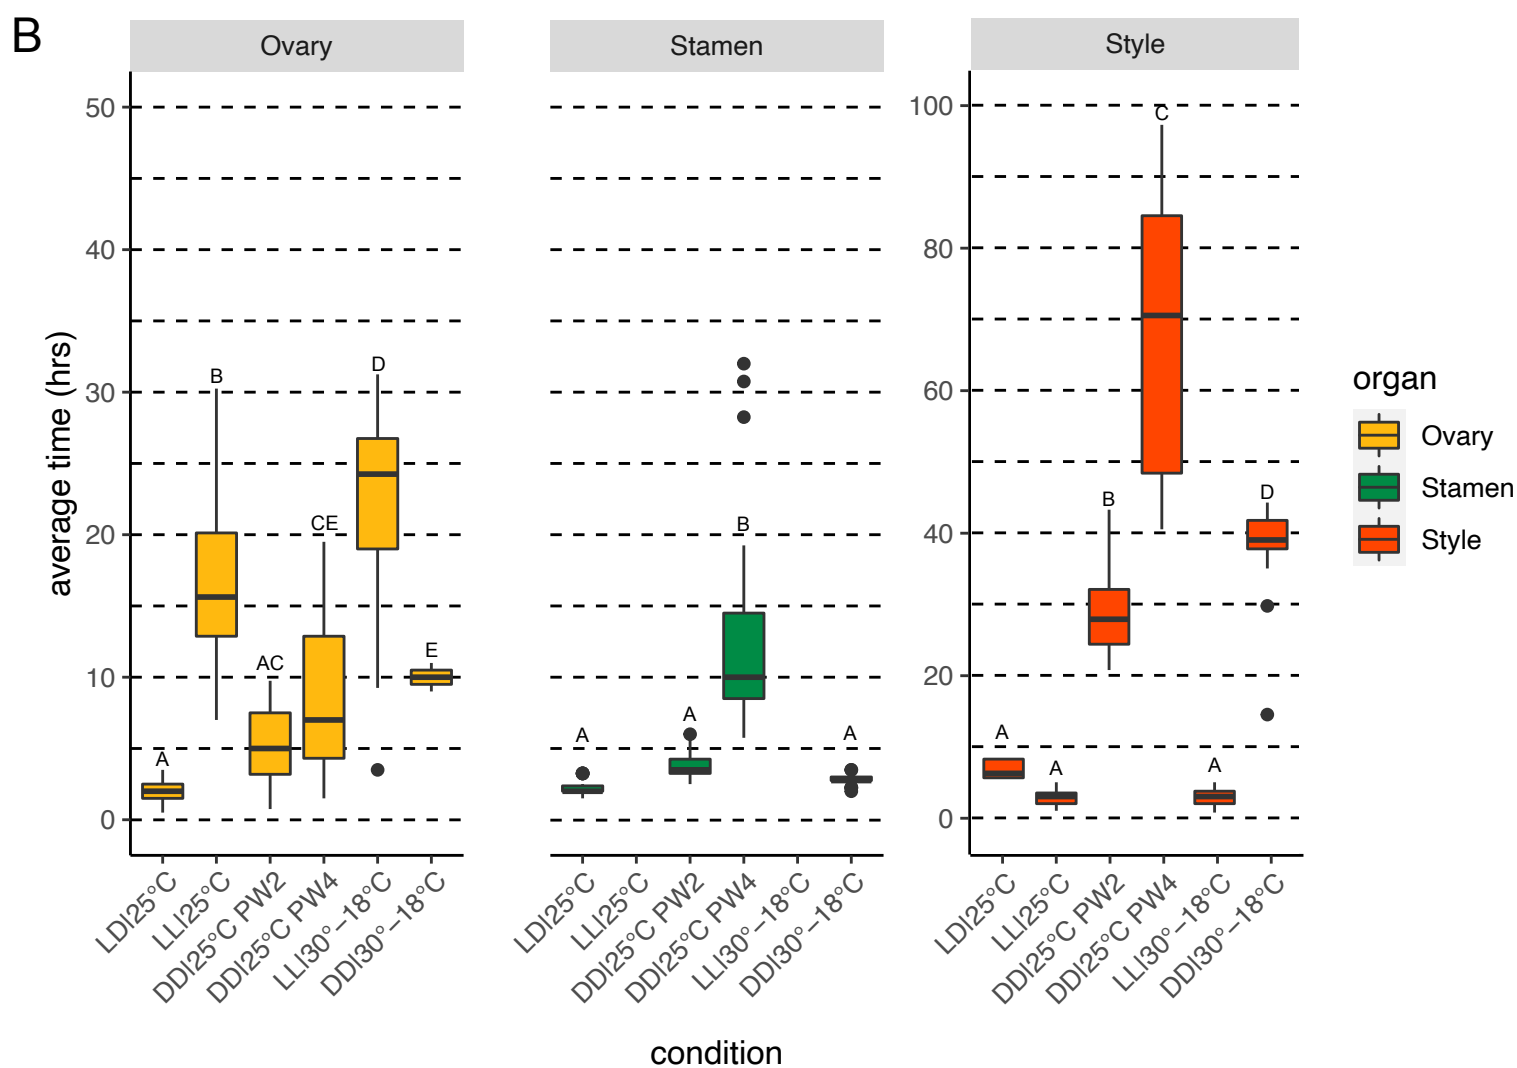

Supplement: supp [file elife_poa_e80984_Figure_3_figure_supplement_2.pdf › elife_poa_e80984_Figure_3_figure_supplement_2.pdf]

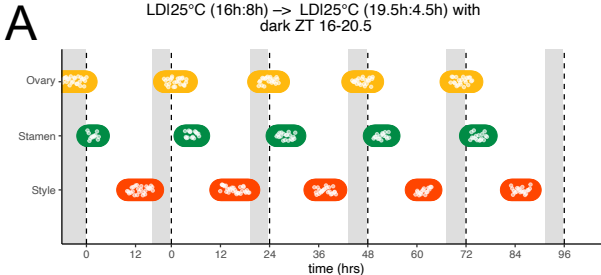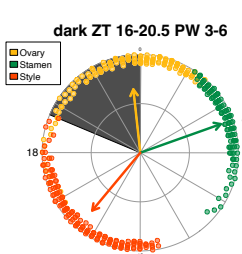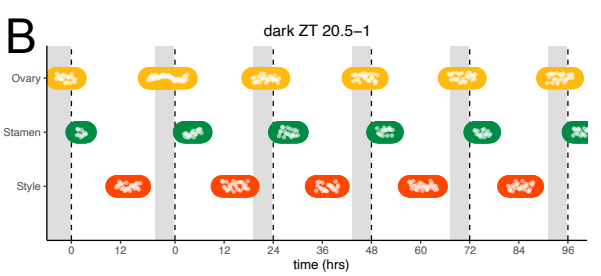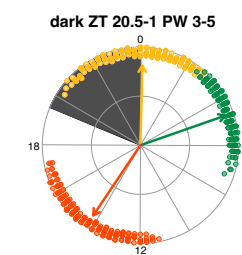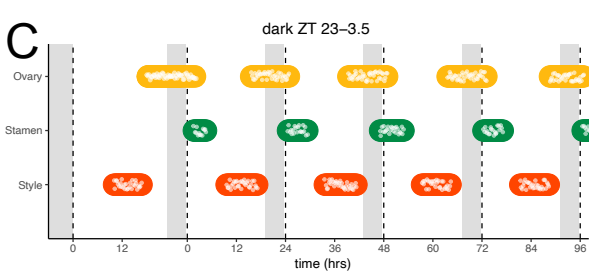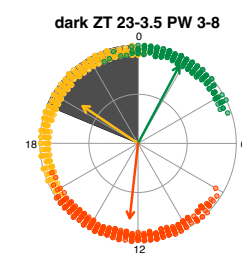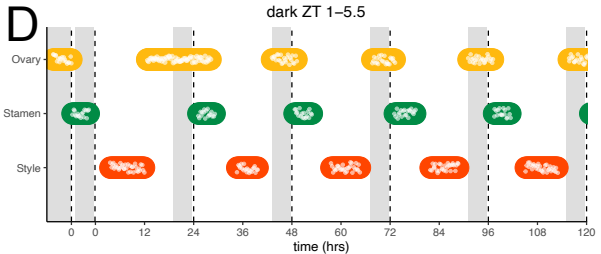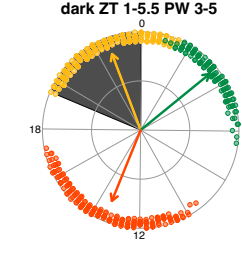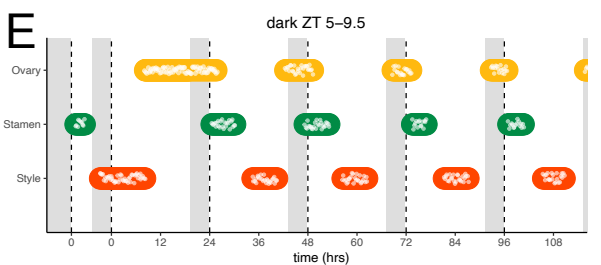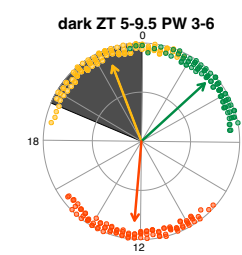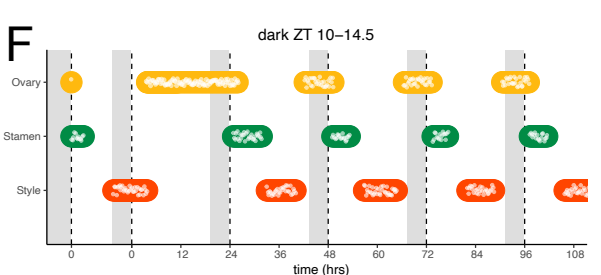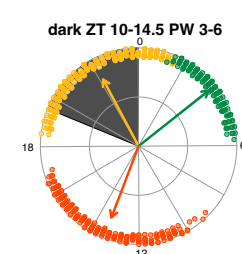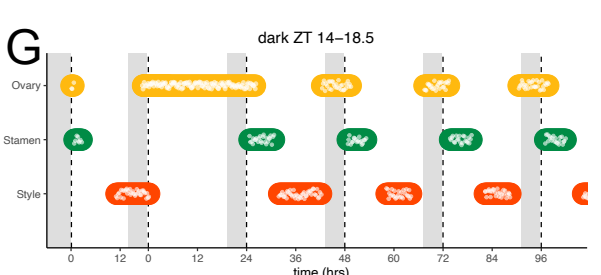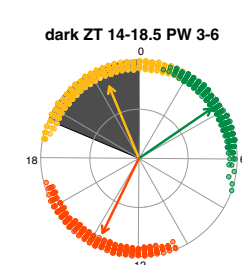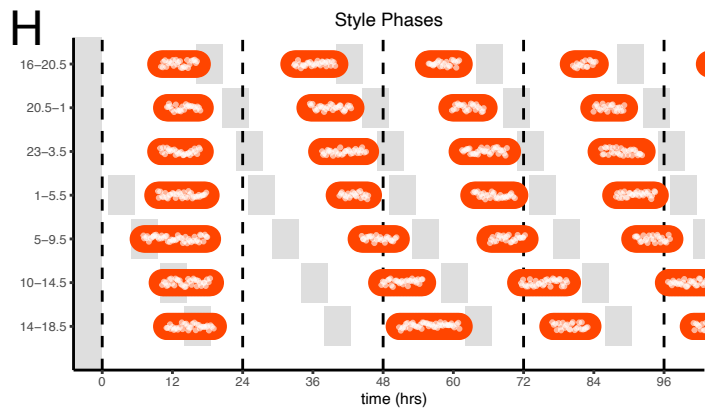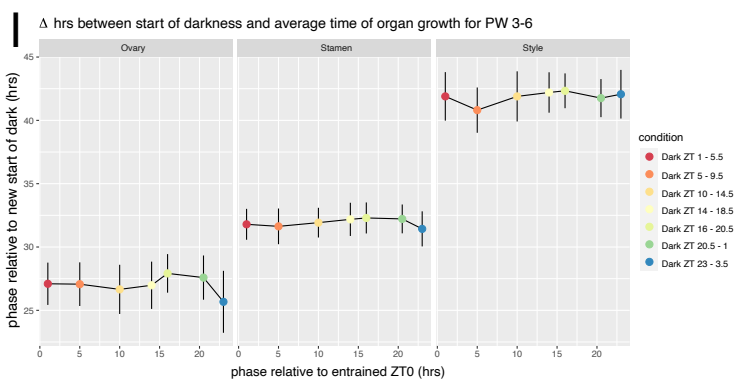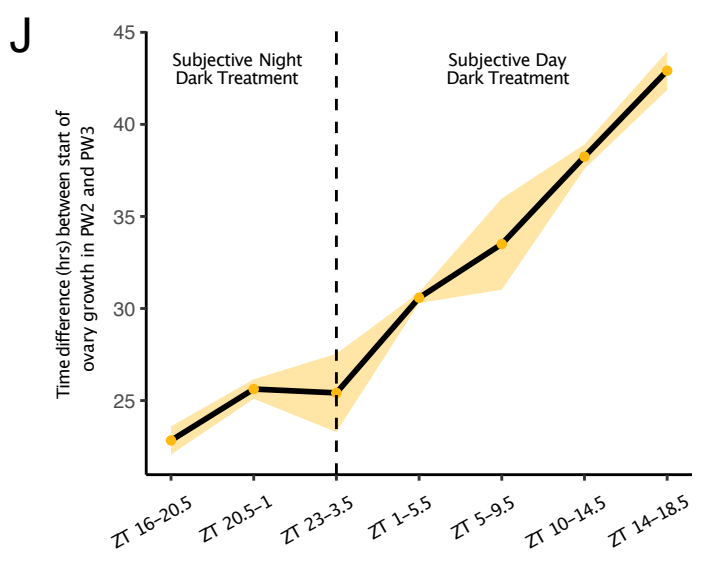

Supplement: supp [file elife_poa_e80984_Figure_4_figure_supplement_1.pdf › elife_poa_e80984_Figure_4_figure_supplement_1.pdf]

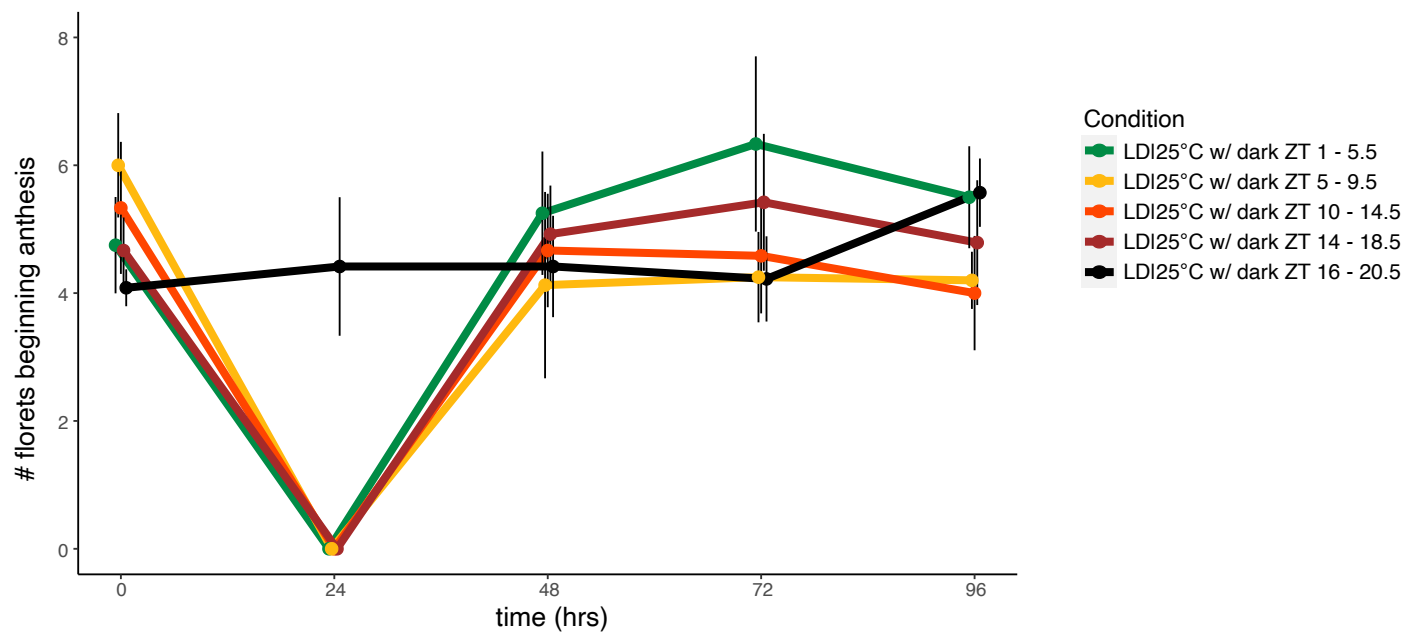

| ZT | 1-5.5 | 5-9.5 | 10-14.5 | 14-18.5 | 16-20.5 |
|----|-------|-------|---------|---------|---------|
| 0  | A     | B     | AB      | A       | AC      |
| 24 | D     | D     | D       | D       | E       |
| 48 | F     | F     | F       | F       | F       |
| 72 | G     | HJ    | HI      | GH      | IJ      |
| 96 | K     | LOP   | ML      | KMO     | KNP     |

Supplement: supp [file elife_poa_e80984_Figure_4_figure_supplement_2.pdf › elife_poa_e80984_Figure_4_figure_supplement_2.pdf]

**A**

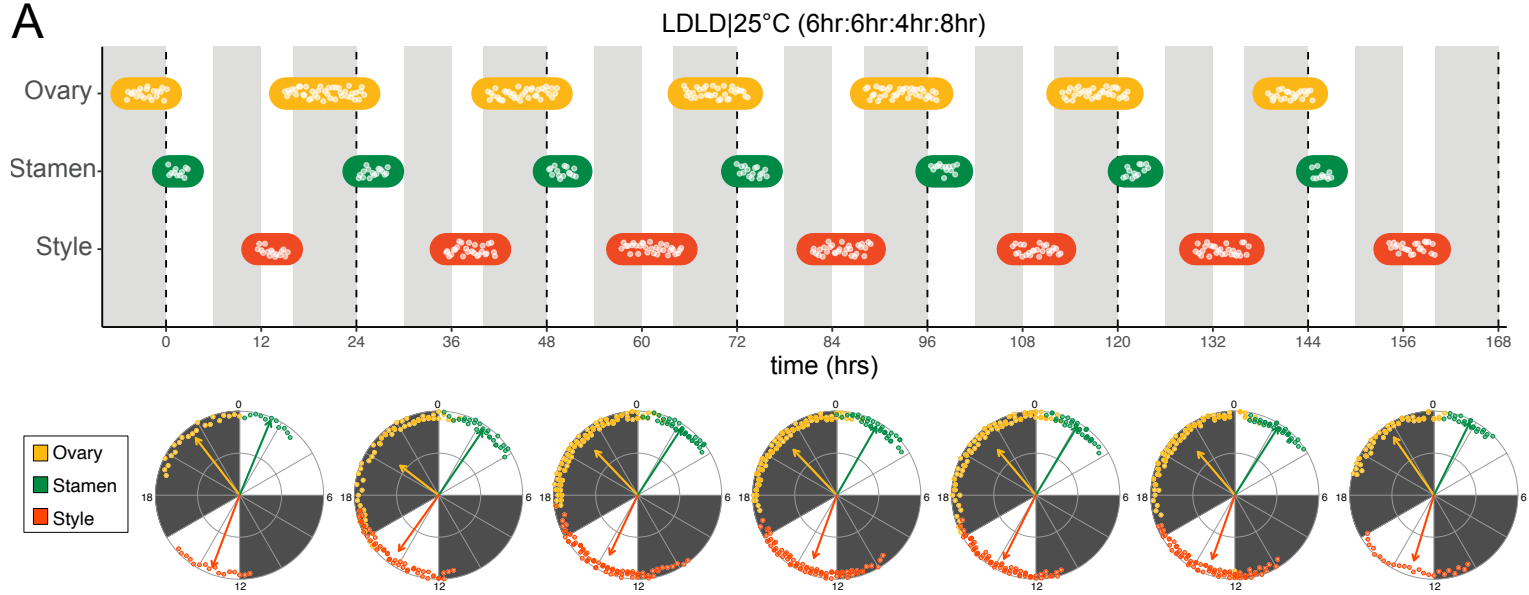

B

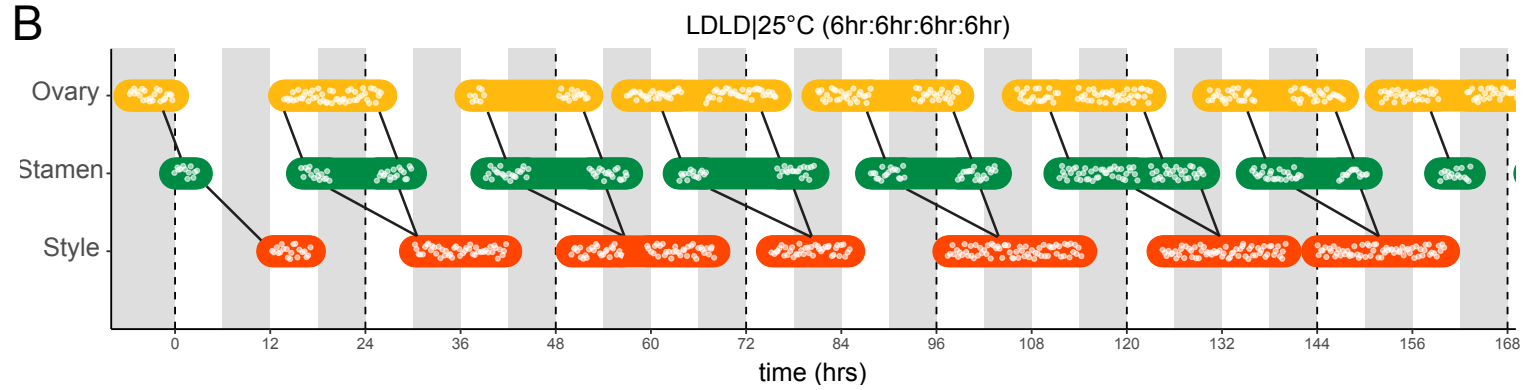

Supplement: supp [file elife_poa_e80984_Figure_5_figure_supplement_1.pdf › elife_poa_e80984_Figure_5_figure_supplement_1.pdf]

A

LD|25°C (12h:12h)

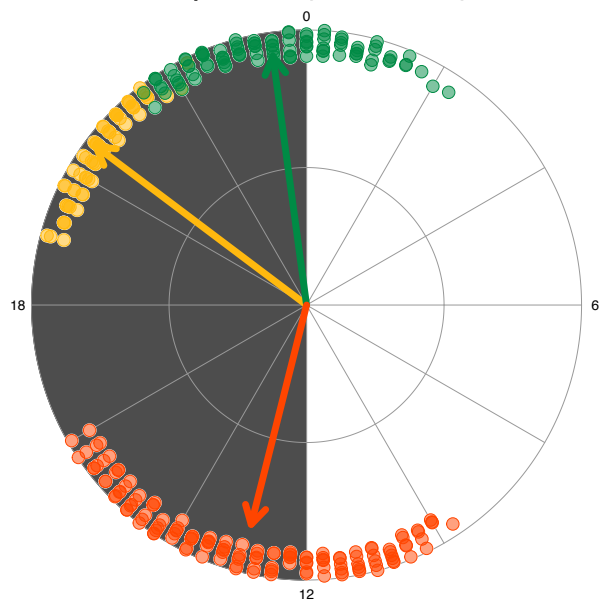

B

LD|25°C (16h:8h)

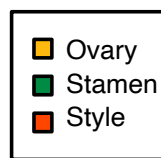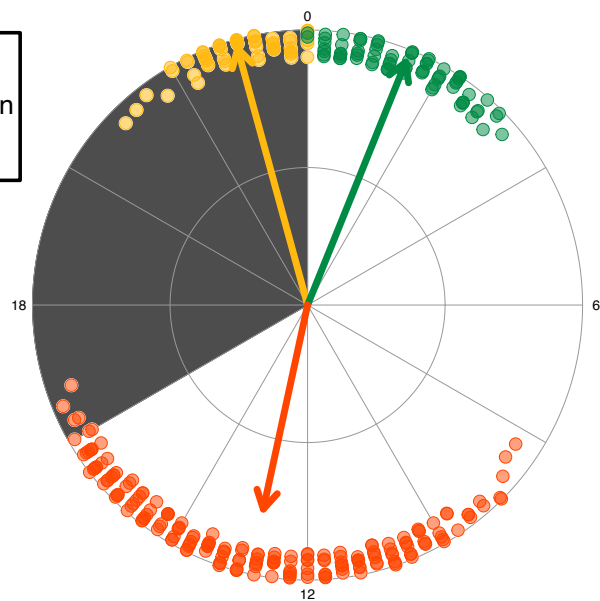

C

LL|25°C

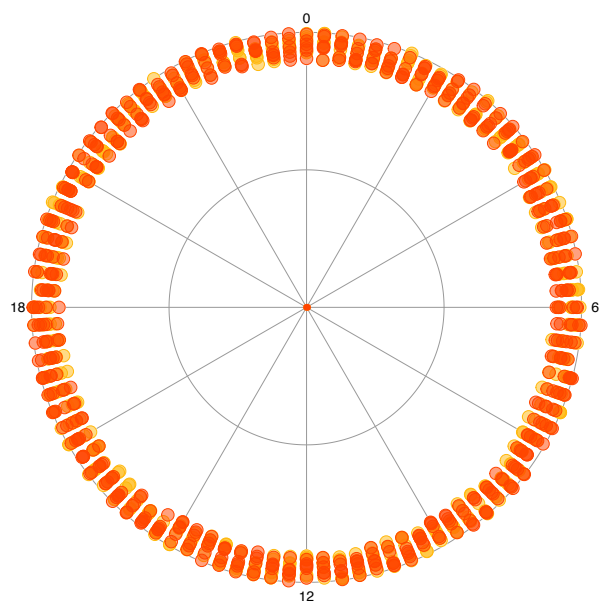

D

DD|25°C

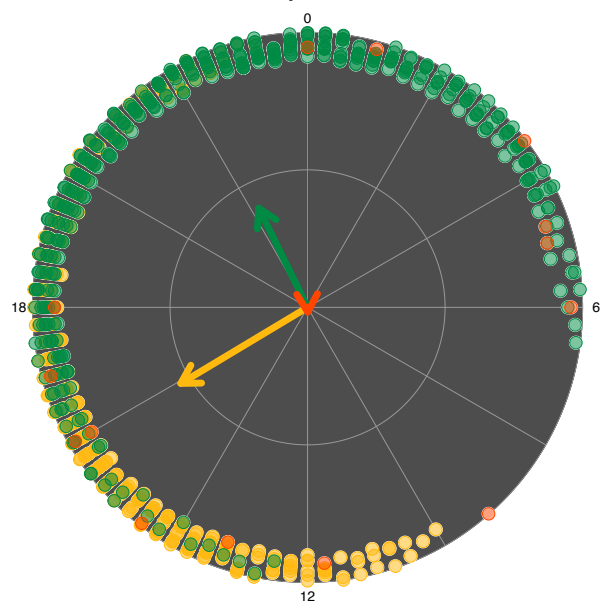

E

LL|30°-18°C (16h:8h)

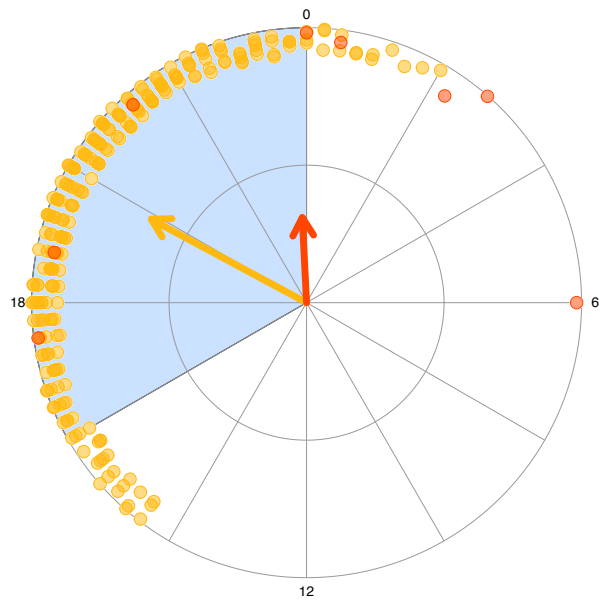

F

DD|30°-18°C (16h:8h)

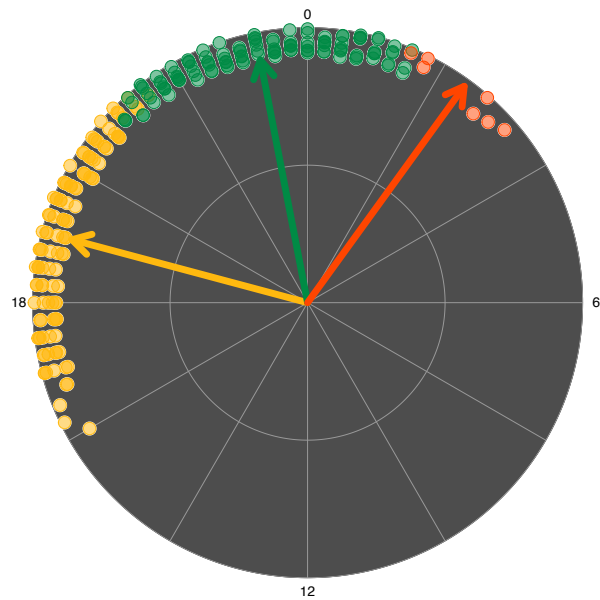

Supplement: supp [file elife_poa_e80984_Figure_5_figure_supplement_2.pdf › elife_poa_e80984_Figure_5_figure_supplement_2.pdf]

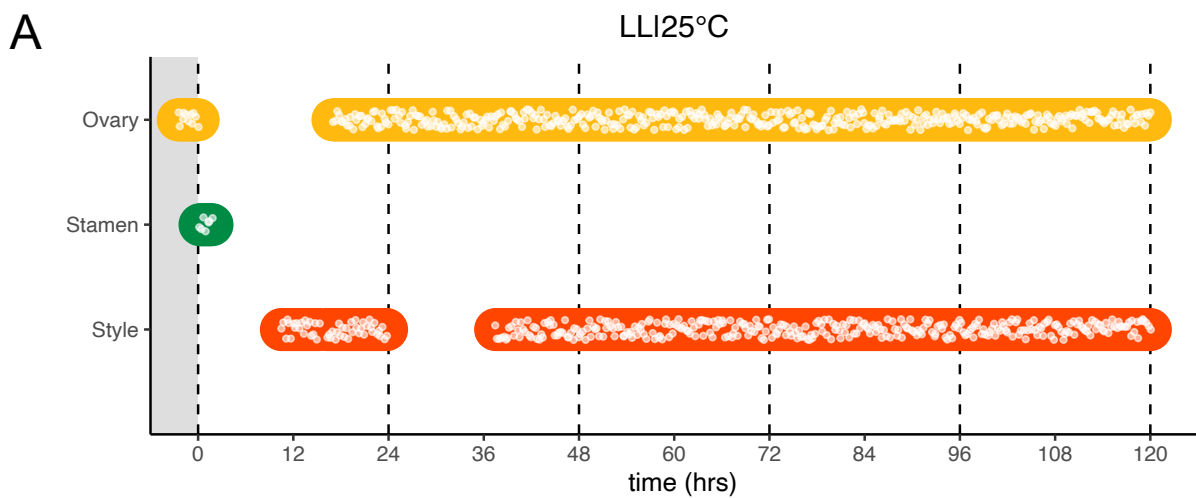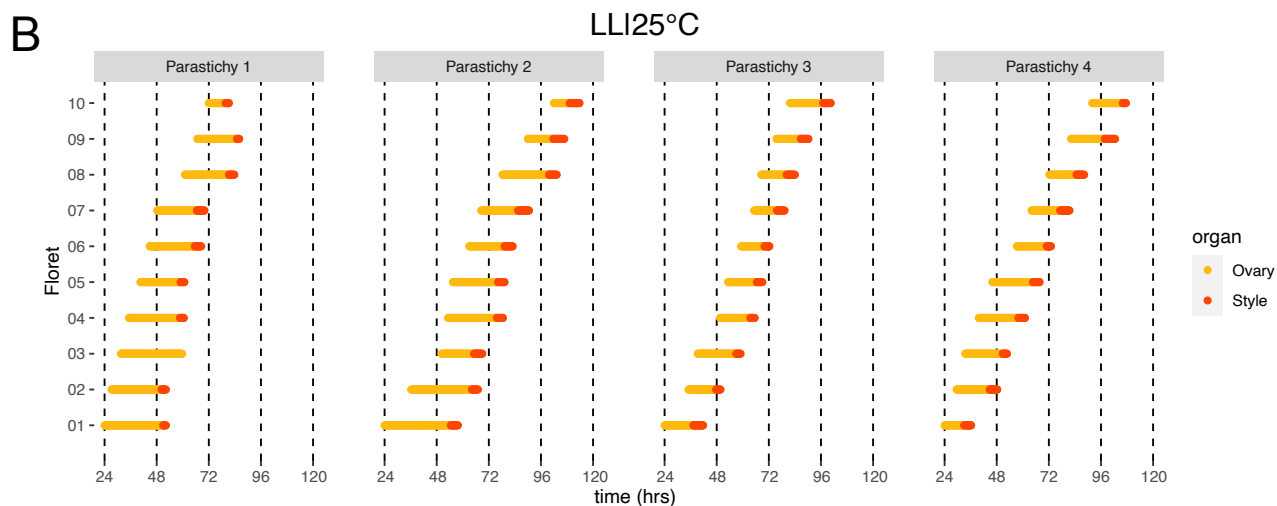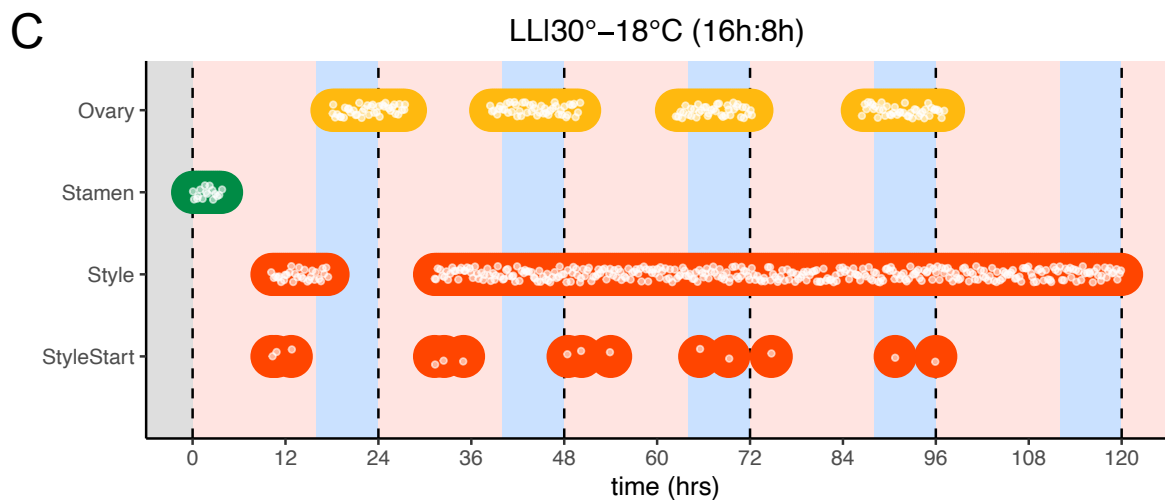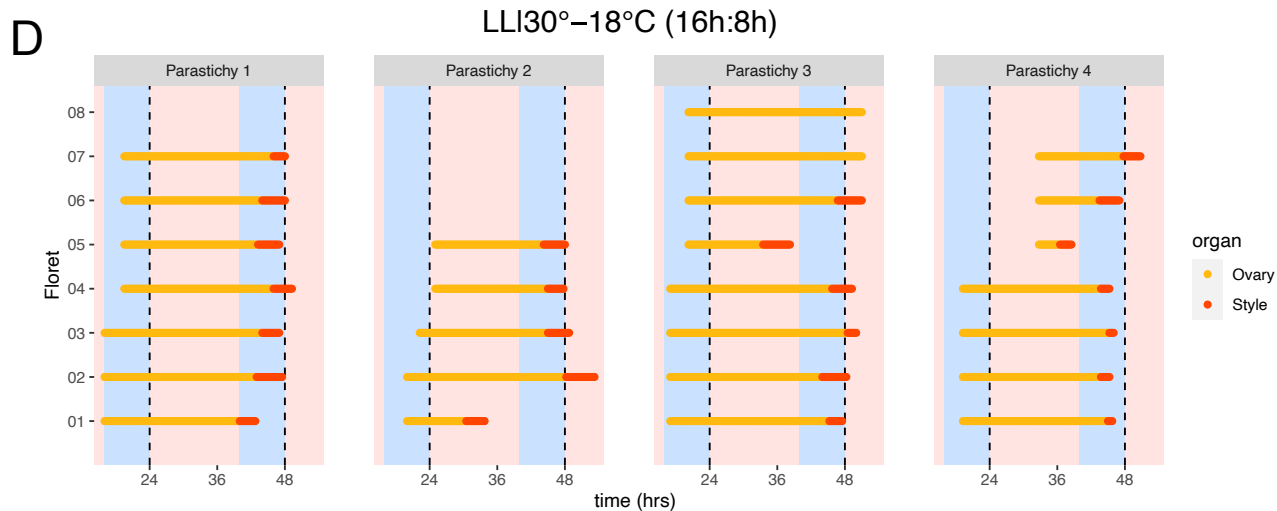

Supplement: supp [file elife_poa_e80984_Figure_6_figure_supplement_1.pdf › elife_poa_e80984_Figure_6_figure_supplement_1.pdf]

A

DDI30°-18°C (16h:8h)

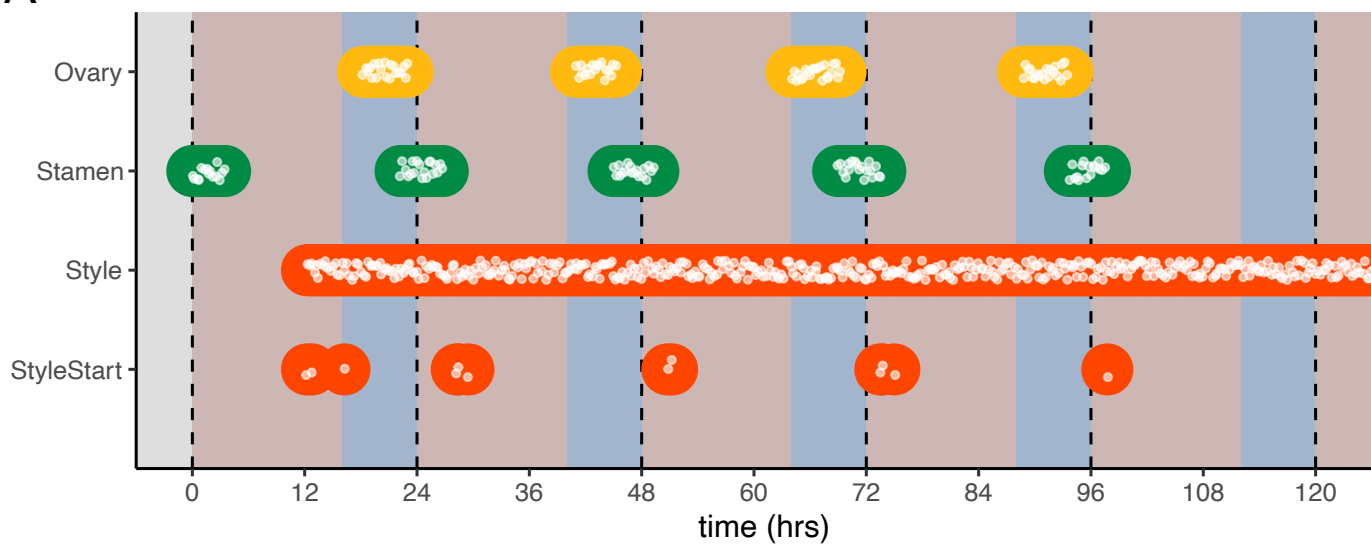

B

DDI30°-18°C (16h:8h)

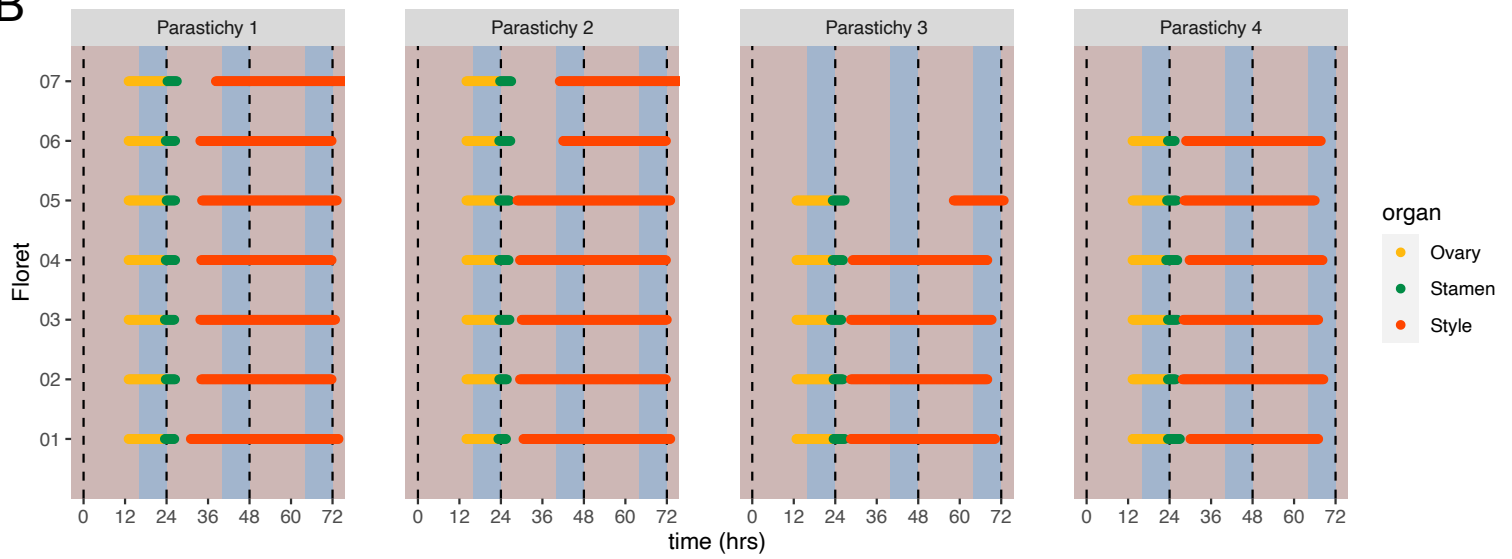

Supplement: supp [file elife_poa_e80984_Figure_6_figure_supplement_2.pdf › elife_poa_e80984_Figure_6_figure_supplement_2.pdf]

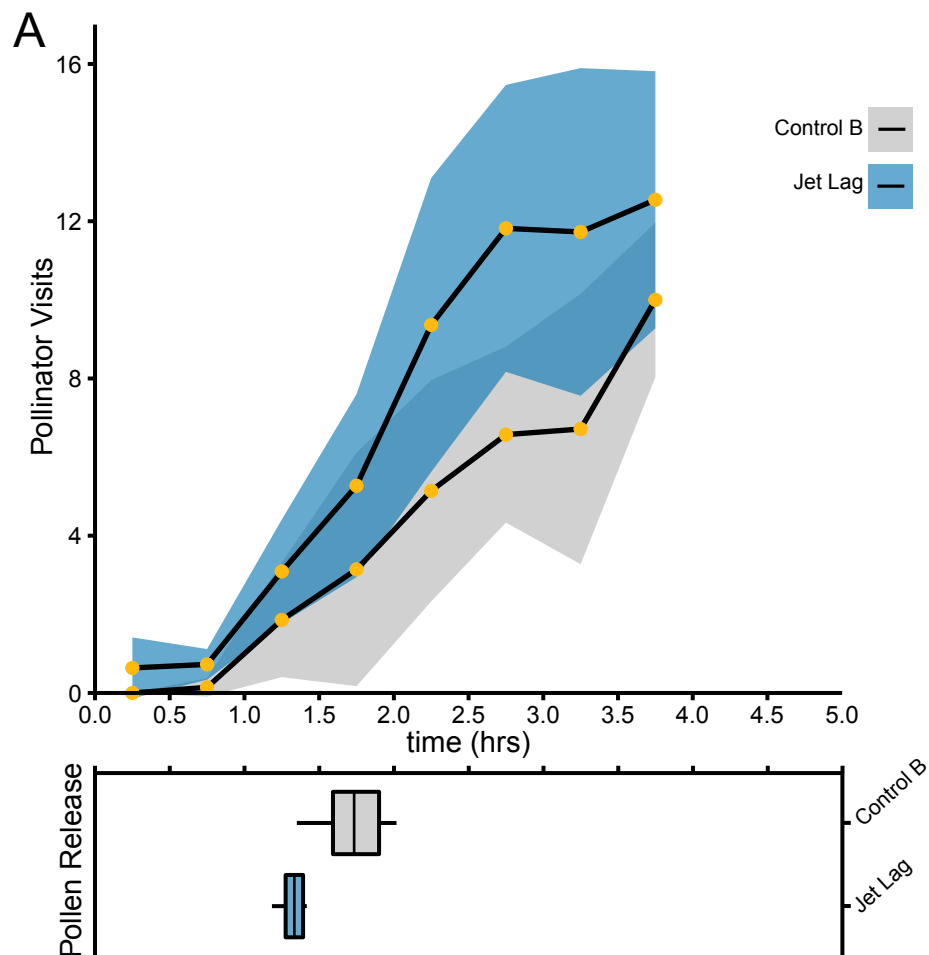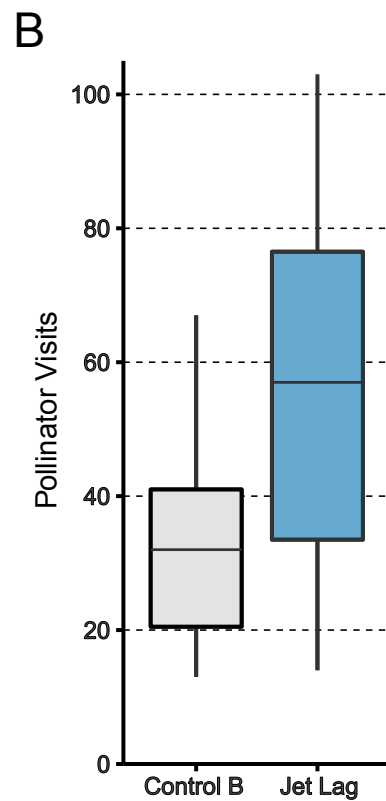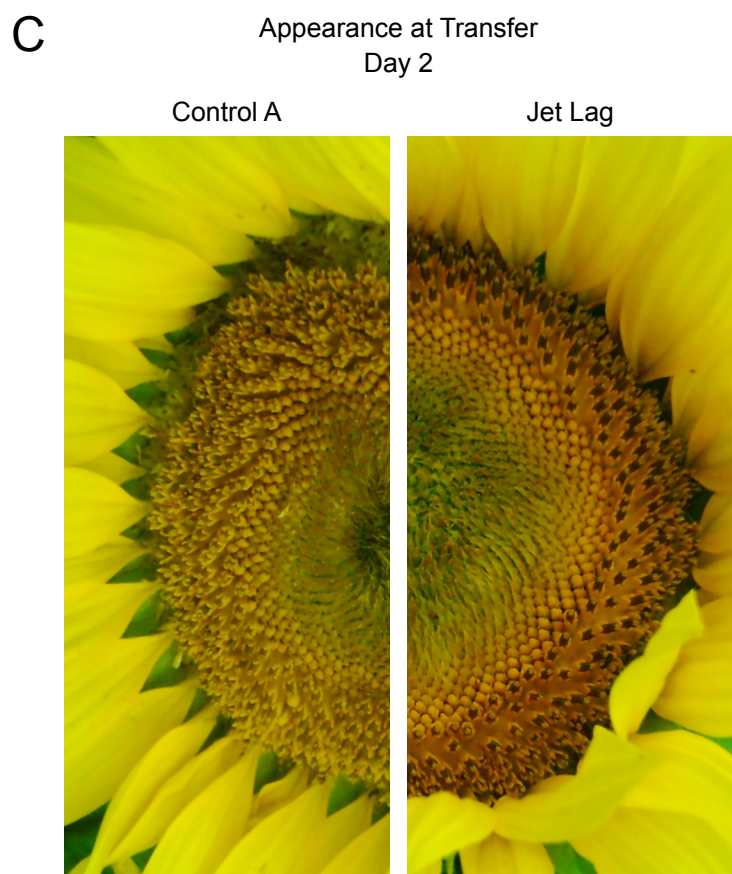

Supplement: supp [file elife_poa_e80984_Figure_7_figure_supplement_1.pdf › elife_poa_e80984_Figure_7_figure_supplement_1.pdf]
